# Supplementary material
Source: Springer Nature journal article supplement (https://www.springermedizin.de/resource/supplementary/12874_2012_944_MOESM3_ESM.pdf/9433218)
Supplement: MOESM3 [file 9433218]

**Systematically reviewing and synthesising conversation analytic and related discursive research to inform healthcare communication practice and policy: An illustrated guide**

**Ruth H Parry and Victoria Land**

**ADDITIONAL FILE THREE:**

**Template used for data extraction (background details, findings and claims) of papers in the Review of Future Talk**

| <b>Review details</b>   |  | <b>Notes</b> |
|-------------------------|--|--------------|
| Name of reviewer        |  |              |
| Date of review          |  |              |
| Unique reference number |  |              |

| <b>Publication details</b> |                                                                   |  |
|----------------------------|-------------------------------------------------------------------|--|
| Title                      |                                                                   |  |
| Author(s)                  |                                                                   |  |
| Year of publication        |                                                                   |  |
| Source of publication      | E.g. Journal title, volume, issue and pp OR book reference and pp |  |

| <b>Data</b>                             |  |  |
|-----------------------------------------|--|--|
| Recording – audio visual or audio only? |  |  |
| Co-present participants or non co-      |  |  |

|                                                                       |                                                                                                                                                                                                                             |  |
|-----------------------------------------------------------------------|-----------------------------------------------------------------------------------------------------------------------------------------------------------------------------------------------------------------------------|--|
| present?                                                              |                                                                                                                                                                                                                             |  |
| Interactions are one-to-one, multiparty or both?                      |                                                                                                                                                                                                                             |  |
| Institutional or mundane interaction?                                 |                                                                                                                                                                                                                             |  |
| Country in which data was collected                                   |                                                                                                                                                                                                                             |  |
| Setting(s)                                                            |                                                                                                                                                                                                                             |  |
| Participants                                                          | Number of participants and characteristics of participants (if stated)                                                                                                                                                      |  |
| Size of the data set                                                  | Include, for example, details of the number of interactions, total or average length of interactions, if multiple settings records how many interactions in each setting, and any other features of the data set mentioned. |  |
| Number of episodes in collection(s)                                   |                                                                                                                                                                                                                             |  |
| Number of episodes from the collection that appear in the publication | Number of episodes from the collection that appear in the publication rather than just the number of data fragments shown                                                                                                   |  |

|                                                             |  |  |
|-------------------------------------------------------------|--|--|
| <b>Method</b>                                               |  |  |
| Methodological approach (as described by author(s))         |  |  |
| Reviewer's comment on methodological approach (if relevant) |  |  |

---

**FINDINGS OVERALL SUMMARY**

Complete this table for each finding (complete for primary findings first and then secondary findings):

| <b>Summary of Findings</b>            |  | <b>Notes</b> |
|---------------------------------------|--|--------------|
| Phenomenon (in brief)                 |  |              |
| Phenomenon in author's own words      |  |              |
| Research question/aim                 |  |              |
| Number of relevant primary findings   |  |              |
| Number of relevant secondary findings |  |              |

**RELEVANT INDIVIDUAL FINDINGS**

| <b>Findings</b>                                                                          |                                                                                                                                                              | <b>Notes</b> |
|------------------------------------------------------------------------------------------|--------------------------------------------------------------------------------------------------------------------------------------------------------------|--------------|
| Finding number                                                                           | Number in the order they appear in the paper                                                                                                                 |              |
| Phenomenon (in brief)                                                                    |                                                                                                                                                              |              |
| Phenomenon in author's own words                                                         |                                                                                                                                                              |              |
| Research question for this finding (if applicable)                                       |                                                                                                                                                              |              |
| Is talk about the future an inherent element or an incidental element of the phenomenon? |                                                                                                                                                              |              |
| Primary or secondary focus of research?                                                  |                                                                                                                                                              |              |
| Number of episodes pertaining to this finding                                            | State number of episodes for this finding that appear in the article AND number of episodes for this finding in the collection (if information is available) |              |
| Archetypal sequence                                                                      |                                                                                                                                                              |              |
| Features of the talk in which the phenomenon is produced                                 | Use I, II, III, IV, V, etc.                                                                                                                                  |              |
| What are the implications of these environmental features?                               | Why do it there?                                                                                                                                             |              |
| Sequence and/or turn design features of the phenomenon                                   | Use A, B, C, D, E, etc.                                                                                                                                      |              |
| What are the interactional effects                                                       | Why do it like this?                                                                                                                                         |              |

|                                                             |                          |  |
|-------------------------------------------------------------|--------------------------|--|
| of these design features?                                   |                          |  |
| In sum, what is the overarching function of the phenomenon? | Direct quote if possible |  |
| Author-proposed implications                                |                          |  |
| Any other implications                                      |                          |  |
| Notes                                                       |                          |  |
